# Supplementary material for: Structural and Functional Insights into CP2c Transcription Factor Complexes
Source: MDPI journal article supplement (doi:10.3390/ijms23126369), 2022-06-07
Supplement: s1 [file s1]

# Supplementary Materials

## Structural and functional insights into CP2c transcription factor complexes

**Seung Han Son<sup>1,§</sup>, Min Young Kim<sup>1,§</sup>, Eunbi Jo<sup>1</sup>, Vladimir N. Uversky<sup>2,\*</sup>, Chul Geun Kim<sup>1,3,\*</sup>**

<sup>1</sup> Department of Life Science and Research Institute for Natural Sciences, College of Natural Sciences, Hanyang University, Seoul 04763, Korea; [imsangok12@naver.com](mailto:imsangok12@naver.com) (S.H.S.); [choeunbi0324@naver.com](mailto:choeunbi0324@naver.com) (E.J.); [5718my@naver.com](mailto:5718my@naver.com) (M.Y.K); [cgkim@hanyang.ac.kr](mailto:cgkim@hanyang.ac.kr) (C.G.K.)

<sup>2</sup> Department of Molecular Medicine, Morsani College of Medicine, University of South Florida, Tampa, Florida 33612, USA; [vuversky@usf.edu](mailto:vuversky@usf.edu) (V.N.U.)

<sup>3</sup> CGK Biopharma Co. Ltd., 222 Wangshipri-ro, Sungdong-gu, Seoul 04763, Korea; [cgkim@hanyang.ac.kr](mailto:cgkim@hanyang.ac.kr) (C.G.K.)

\*Correspondence: [vuversky@usf.edu](mailto:vuversky@usf.edu) (V.N.U.); [cgkim@hanyang.ac.kr](mailto:cgkim@hanyang.ac.kr) (C.G.K.)

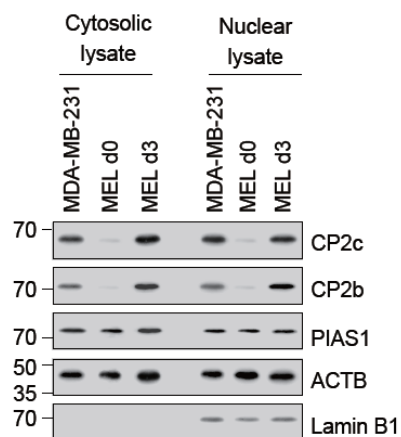

**Figure S1. Endogenous CP2b exists in both nucleus and cytosol.** Cytosolic lysate and nuclear lysate were subjected to western blots by using specific antibodies against CBP complex proteins. Lamin B1 was employed as a nuclear protein control.

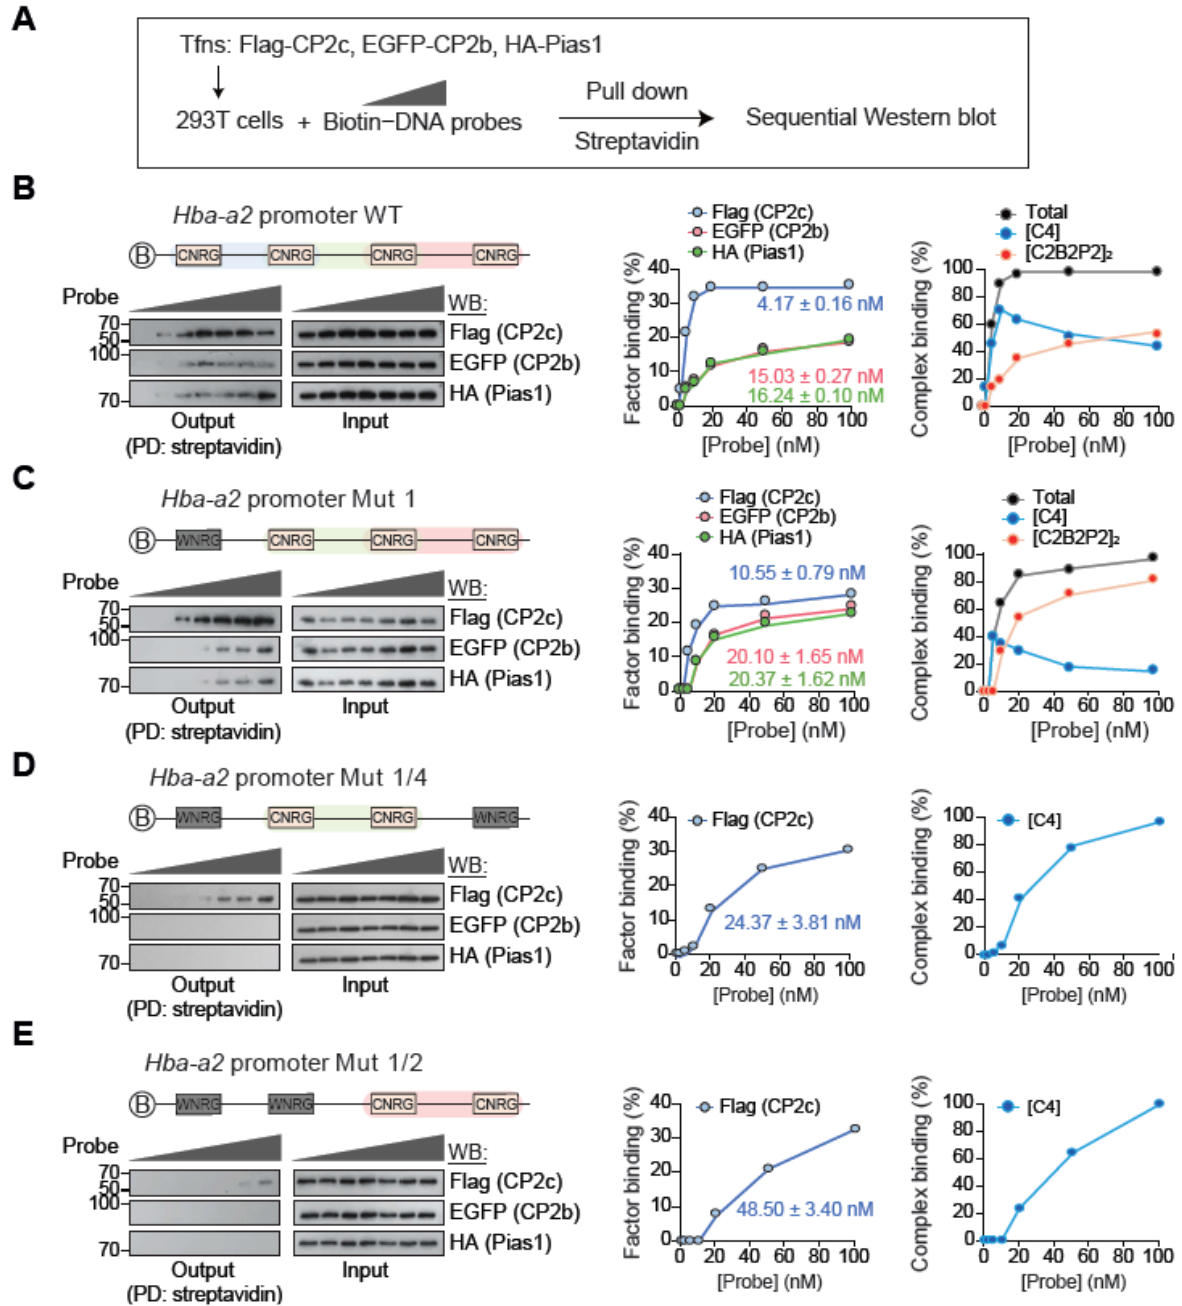

**Figure S2. [C4] shows synergism to both [C4] and [C2B2P2]<sub>2</sub> for target DNA binding. (A)** Experimental scheme to identify the binding efficiency of CP2c complex proteins *in vitro* by South-Western analysis. Immunoblots and quantified DNA binding efficiency with estimated K<sub>d</sub> in the *Hba-a2* promoter probes with WT (**B**), Mut 1 (**C**), Mut 1/4 (**D**), and Mut 1/2 (**E**).

**Table S1. Oligonucleotides**

| name                                                                  | sequence                                                                                              |
|-----------------------------------------------------------------------|-------------------------------------------------------------------------------------------------------|
| <b>for Plasmid construction</b>                                       |                                                                                                       |
| CP2 BS probe_F                                                        | 5'- GCT AGC GAT CCC AAG TTT TAC TCG GTA GAG CAA GCA CAA ACC AGG-3'                                    |
| CP2 BS probe_R                                                        | 5'- CTC GAG CCT GGT TTG TGC TTG CTC TAC CGA GTA AAA CTT GGG ATC-3'                                    |
| Gata1 WT enhancer F                                                   | 5' - GCT AGC CGA GTC CAT CTG ATA AGA CTT ATC TGC TGC CCC AGA GCA GGC CAG AGC TGG CGT AAG CCC CAG -3'  |
| Gata1 WT enhancer R                                                   | 5' - CTC GAG CTG GGG CTT ACG CCA GCT CTG GCC TGC TCT GGG GCA GCA GAT AAG TCT TAT CAG ATG GAC TCG -3'  |
| Gata1 Mut 1/3 enhancer F                                              | 5' -GCT AGC CGA GTC CAT CTG ATA AGA CTT ATC TGC TGC CAC AGA GCA GGT AAG AGC TGG CGT AAG CCC CAG - 3'  |
| Gata1 Mut 1/3 enhancer R                                              | 5' - CTC GAG CTG GGG CTT ACG CCA GCT CTT ACC TGC TCT GTG GCA GCA GAT AAG TCT TAT CAG ATG GAC TCG - 3' |
| Gata1 Mut 2/4 enhancer F                                              | 5' - GCT AGC CGA GTC CAT CTG ATA AGA CTT ATC AGC AGC CCC AGA TTG AGC CAG ATT GAG CGT AAG CCC CAG -3'  |
| Gata1 Mut 2/4 enhancer R                                              | 5' - CTC GAG CTG GGG CTT ACG CTC AAT CTG GCT CAA TCT GGG GCA GCA GAT AAG TCT TAT CAG ATG GAC TCG - 3' |
| Gata1 Mut 1-4 enhancer F                                              | 5' - GCT AGC CGA GTC CAT CTG ATA AGA CTT ATC TGC TGC CAC AGA TTG AGT AAG ATT GAG CGT AAG CCC CAG - 3' |
| Gata1 Mut 1-4 enhancer R                                              | 5' - CTC GAG CTG GGG CTT ACG CTC AAT CTT ACT CAA TCT GTG GCA GCA GAT AAG TCT TAT CAG ATG GAC TCG - 3' |
| <b>for Chromatin immunoprecipitation quantitative PCR (ChIP-qPCR)</b> |                                                                                                       |
| MRE HS26-2_F                                                          | 5'-CCA CTG TGG GAT CTA TGG AG-3'                                                                      |
| MRE HS26-2_R                                                          | 5'-CTT TCT GAC TCT GTA CCC CC-3'                                                                      |
| MRE HS21-2_F                                                          | 5'-GCA CCT ATG CTC ACC TAT CT-3'                                                                      |
| MRE HS21-2_R                                                          | 5'-CTT CCC TCA CTG AGA ATG TCT-3'                                                                     |
| MRE HS21-4_F                                                          | 5'-TGG AGG CAG CTG GAA CAG AA-3'                                                                      |
| MRE HS21-4_R                                                          | 5'-GCC TGG AAG TCC TGT GGT A-3'                                                                       |
| Hba-a2 upstream_F                                                     | 5'-GTC ACC AAA ACC AGC TCA GA-3'                                                                      |
| Hba-a2 upstream_R                                                     | 5'-GCC AGA CTC CTC CTT CAG AC-3'                                                                      |
| Hba-a2 promoter_F                                                     | 5'- GAT CCC AAG TTT TAC TCG GTA GAG CAA GCA CAA ACC AGG-3'                                            |
| Hba-a2 promoter_R                                                     | 5'- GAT CCC TGG TTT GTG CTT GCT CTA CCG AGT AAA ACT TGG -3'                                           |
| LCR HS2_F                                                             | 5'-AGG GTG TGT GGC CAG ATG TT-3'                                                                      |
| LCR HS2_R                                                             | 5'-ACC CAG ATA GCA CTG ATC AGT CAC-3'                                                                 |
| Hbb-b1 promoter_F                                                     | 5'-GCT TCT GAC ATA GTT GTG TTG ACT CA-3'                                                              |
| Hbb-b1 promoter_R                                                     | 5'-CAG CAG CCT TCT CAG CAT CA-3'                                                                      |
| Gata1 enhancer F                                                      | 5'-CGA GTC CAT CTG ATA AGA CT-3'                                                                      |
| Gata1 enhancer R                                                      | 5'-CTG CAG GCC ACC TCT ATG AA-3'                                                                      |
| Nfe2_promoter_F                                                       | 5'-GGT AAA GGT CCA GTG TCT CC-3'                                                                      |
| Nfe2_promoter_R                                                       | 5'-GTG ATA GCA ACC CTT CCC TC-3'                                                                      |
| <b>for DSP crosslinking (western blot and titration assay)</b>        |                                                                                                       |
| CP2 WT BS probe_F (Bio)                                               | 5'-/5Biosg/GAT CCC AAG TTT TAC TCG GTA GAG CAA GCA CAA ACC AGG-3'                                     |
| CP2 WT BS probe_R (Bio)                                               | 5'-/5Biosg/CCT GGT TTG TGC TTG CTC TAC CGA GTA AAA CTT GGG ATC-3'                                     |
| CP2 Mut1 BS probe_F (Bio)                                             | 5'-/5Biosg/GAT CCA AAG TTT TAC TCG GTA GAG CAA GCA CAA ACC AGG-3'                                     |
| CP2 Mut1 BS probe_R (Bio)                                             | 5'-/5Biosg/CCT GGT TTG TGC TTG CTC TAC CGA GTA AAA CTT TGG ATC-3'                                     |
| CP2 Mut1/2 BS probe_F (Bio)                                           | 5'-/5Biosg/GAT CCA AAG TTT TAT TCG GTA GAG CAA GCA CAA ACC AGG-3'                                     |
| CP2 Mut1/2 BS probe_R (Bio)                                           | 5'-/5Biosg/CCT GGT TTG TGC TTG CTC TAC CGA ATA AAA CTT TGG ATC-3'                                     |
| CP2 Mut1/4 BS probe_F (Bio)                                           | 5'-/5Biosg/GAT CCA AAG TTT TAC TCG GTA GAG CAA GCA CAA ATC AGG-3'                                     |
| CP2 Mut1/4 BS probe_R (Bio)                                           | 5'-/5Biosg/CCT GAT TTG TGC TTG CTC TAC CGA GTA AAA CTT TGG ATC-3'                                     |
| CP2 Mut4 BS probe_F (Bio)                                             | 5'-/5Biosg/GAT CCC AAG TTT TAC TCG GTA GAG CAA GCA CAA ATC AGG-3'                                     |
| CP2 Mut4 BS probe_R (Bio)                                             | 5'-/5Biosg/CCT GAT TTG TGC TTG CTC TAC CGA GTA AAA CTT GGG ATC-3'                                     |
| CP2 Mut3/4 BS probe_F (Bio)                                           | 5'-/5Biosg/GAT CCC AAG TTT TAC TCG GTA GAG TAA GCA CAA ATC AGG-3'                                     |
| CP2 Mut3/4 BS probe_R (Bio)                                           | 5'-/5Biosg/CCT GAT TTG TGC TTA CTC TAC CGA GTA AAA CTT GGG ATC-3'                                     |
| Gata WT enhancer F (Bio)                                              | 5'-/5Biosg/CGA GTC CAT CTG ATA AGA CTT ATC TGC TGC CCC AGA GCA GGC CAG AGC TGG CGT AAG CCC CAG-3'     |
| Gata WT enhancer R (Bio)                                              | 5'-/5Biosg/CTG GGG CTT ACG CCA GCT CTG GCC TGC TCT GGG GCA GCA GAT AAG TCT TAT CAG ATG GAC TCG-3'     |
| Gata Mut1/3 enhancer F (Bio)                                          | 5'-/5Biosg/CGA GTC CAT CTG ATA AGA CTT ATC TGC TGC CAC AGA GCA GGT AAG AGC TGG CGT AAG CCC CAG-3'     |
| Gata Mut1/3 enhancer R (Bio)                                          | 5'-/5Biosg/CTG GGG CTT ACG CCA GCT CTT ACC TGC TCT GTG GCA GCA GAT AAG TCT TAT CAG ATG GAC TCG-3'     |
| <b>for DNA-immunoprecipitation (DNA-IP)</b>                           |                                                                                                       |
| CP2 WT BS probe_F                                                     | 5'- GCT AGC GAT CCC AAG TTT TAC TCG GTA GAG CAA GCA CAA ACC AGG-3'                                    |
| CP2 WT BS probe_R                                                     | 5'- CTC GAG CCT GGT TTG TGC TTG CTC TAC CGA GTA AAA CTT GGG ATC-3'                                    |
| CP2 Mut1 BS probe_F                                                   | 5'- GCT AGC GAT CCA AAG TTT TAC TCG GTA GAG CAA GCA CAA ACC AGG-3'                                    |
| CP2 Mut1 BS probe_R                                                   | 5'- CTC GAG CCT GGT TTG TGC TTG CTC TAC CGA GTA AAA CTT TGG ATC-3'                                    |
| CP2 Mut2 BS probe_F                                                   | 5'- GCT AGC GAT CCC AAG TTT TAT TCG GTA GAG CAA GCA CAA ACC AGG-3'                                    |
| CP2 Mut2 BS probe_R                                                   | 5'- CTC GAG CCT GGT TTG TGC TTG CTC TAC CGA ATA AAA CTT GGG ATC-3'                                    |
| CP2 Mut3 BS probe_F                                                   | 5'- GCT AGC GAT CCC AAG TTT TAC TCG GTA GAG TAA GCA CAA ACC AGG-3'                                    |
| CP2 Mut3 BS probe_R                                                   | 5'- CTC GAG CCT GGT TTG TGC TTA CTC TAC CGA GTA AAA CTT GGG ATC-3'                                    |
| CP2 Mut4 BS probe_F                                                   | 5'- GCT AGC GAT CCC AAG TTT TAC TCG GTA GAG CAA GCA CAA ATC AGG-3'                                    |
| CP2 Mut4 BS probe_R                                                   | 5'- CTC GAG CCT GAT TTG TGC TTG CTC TAC CGA GTA AAA CTT GGG ATC-3'                                    |
| CP2 Mut1/2 BS probe_F                                                 | 5'- GCT AGC GAT CCA AAG TTT TAT TCG GTA GAG CAA GCA CAA ACC AGG-3'                                    |
| CP2 Mut1/2 BS probe_R                                                 | 5'- CTC GAG CCT GGT TTG TGC TTG CTC TAC CGA ATA AAA CTT TGG ATC-3'                                    |
| CP2 Mut1/3 BS probe_F                                                 | 5'- GCT AGC GAT CCA AAG TTT TAC TCG GTA GAG TAA GCA CAA ACC AGG-3'                                    |
| CP2 Mut1/3 BS probe_R                                                 | 5'- CTC GAG CCT GGT TTG TGC TTA CTC TAC CGA GTA AAA CTT TGG ATC-3'                                    |
| CP2 Mut1/4 BS probe_F                                                 | 5'- GCT AGC GAT CCA AAG TTT TAC TCG GTA GAG CAA GCA CAA ATC AGG-3'                                    |
| CP2 Mut1/4 BS probe_R                                                 | 5'- CTC GAG CCT GAT TTG TGC TTG CTC TAC CGA GTA AAA CTT TGG ATC-3'                                    |
| CP2 Mut2/4 BS probe_F                                                 | 5'- GCT AGC GAT CCC AAG TTT TAT TCG GTA GAG CAA GCA CAA ATC AGG-3'                                    |
| CP2 Mut2/4 BS probe_R                                                 | 5'- CTC GAG CCT GAT TTG TGC TTG CTC TAC CGA ATA AAA CTT GGG ATC-3'                                    |
| CP2 Mut3/4 BS probe_F                                                 | 5'- GCT AGC GAT CCC AAG TTT TAC TCG GTA GAG TAA GCA CAA ATC AGG-3'                                    |
| CP2 Mut3/4 BS probe_R                                                 | 5'- CTC GAG CCT GAT TTG TGC TTA CTC TAC CGA GTA AAA CTT GGG ATC-3'                                    |
| Gata1 WT enhancer F                                                   | 5' - GCT AGC CGA GTC CAT CTG ATA AGA CTT ATC TGC TGC CCC AGA GCA GGC CAG AGC TGG CGT AAG CCC CAG -3'  |
| Gata1 WT enhancer R                                                   | 5' - CTC GAG CTG GGG CTT ACG CCA GCT CTG GCC TGC TCT GGG GCA GCA GAT AAG TCT TAT CAG ATG GAC TCG -3'  |
| Gata1 Mut1/3 enhancer F                                               | 5' -GCT AGC CGA GTC CAT CTG ATA AGA CTT ATC TGC TGC CAC AGA GCA GGT AAG AGC TGG CGT AAG CCC CAG - 3'  |
| Gata1 Mut1/3 enhancer R                                               | 5' - CTC GAG CTG GGG CTT ACG CCA GCT CTT ACC TGC TCT GTG GCA GCA GAT AAG TCT TAT CAG ATG GAC TCG - 3' |
| Gata1 Mut2/4 enhancer F                                               | 5' - GCT AGC CGA GTC CAT CTG ATA AGA CTT ATC AGC AGC CCC AGA TTG AGC CAG ATT GAG CGT AAG CCC CAG -3'  |
| Gata1 Mut2/4 enhancer R                                               | 5' - CTC GAG CTG GGG CTT ACG CTC AAT CTG GCT CAA TCT GGG GCA GCA GAT AAG TCT TAT CAG ATG GAC TCG - 3' |
| Gata1 Mut1-4 enhancer F                                               | 5' - GCT AGC CGA GTC CAT CTG ATA AGA CTT ATC TGC TGC CAC AGA TTG AGT AAG ATT GAG CGT AAG CCC CAG - 3' |
| Gata1 Mut1-4 enhancer R                                               | 5' - CTC GAG CTG GGG CTT ACG CTC AAT CTT ACT CAA TCT GTG GCA GCA GAT AAG TCT TAT CAG ATG GAC TCG - 3' |
